# Supplementary material for: liputils: a Python module to manage individual fatty acid moieties from complex lipids
Source: PubMed Central journal article supplement (PMC7415148; doi:10.1038/s41598-020-70259-9), 2020-08-07
Supplement: 41598_2020_70259_MOESM2_ESM.pdf [file 41598_2020_70259_MOESM2_ESM.pdf]

## Supplemental Material

# liputils - a Python module to manage individual fatty acid moieties from complex lipids

Stefano Manzini<sup>1\*</sup>, Marco Busnelli<sup>1\*</sup>, Alice Colombo<sup>1</sup>, Mostafa Kiamehr<sup>2</sup>, Giulia Chiesa<sup>1</sup>

<sup>1</sup>Department of Pharmacological and Biomolecular Sciences  
Università degli Studi di Milano,  
20133 Milano, Italy

<sup>2</sup> Faculty of Medicine and Health Technology,  
Tampere University,  
33014 Tampere, Finland

\* These authors equally contributed to this work.

Corresponding authors:

Giulia Chiesa, [giulia.chiesa@unimi.it](mailto:giulia.chiesa@unimi.it)

Stefano Manzini [stefano.manzini@unimi.it](mailto:stefano.manzini@unimi.it)

# Supplementary Figure S1

A

|    | A           | B          | C          | D           | E          | F          | G        |
|----|-------------|------------|------------|-------------|------------|------------|----------|
| 1  |             | Group      | Plpp3_WT   | Plpp3_WT    | Plpp3_KO   | Plpp3_WT   | Plpp3_KO |
| 2  |             | Diet       | western    | western     | western    | western    | western  |
| 3  | Lipid class | Lipid name | 16-1       | 16-11       | 16-12      | 16-2       | 16-3     |
| 4  | CE          | CE 14:0    | 337.62167  | 487.77843   | 457.52704  | 358.94604  | 488.6    |
| 5  | CE          | CE 15:0    | 201.57888  | 284.39835   | 244.04901  | 185.30819  | 285.5    |
| 6  | CE          | CE 16:0    | 6063.54769 | 8875.01807  | 7159.75140 | 5527.55985 | 9049.0   |
| 7  | CE          | CE 16:1    | 2128.69699 | 4389.60990  | 3579.84433 | 3010.09907 | 3493.8   |
| 8  | CE          | CE 17:0    | 838.04332  | 1066.96406  | 885.65583  | 757.92779  | 1052.0   |
| 9  | CE          | CE 17:1    | 358.28467  | 512.73542   | 478.67850  | 407.68995  | 475.7    |
| 10 | CE          | CE 18:0    | 1535.53361 | 1859.99044  | 1598.96027 | 1178.68799 | 1807.0   |
| 11 | CE          | CE 18:1    | 8720.33776 | 11175.62366 | 9223.33774 | 9949.22209 | 12983.0  |
| 12 | CE          | CE 18:2    | 1479.38418 | 2299.69718  | 2088.33231 | 1875.98259 | 2071.8   |
| 13 | CE          | CE 18:3    | 215.65419  | 354.54567   | 317.47278  | 256.70301  | 313.6    |
| 14 | CE          | CE 19:0    | 51.32035   | 100.10614   | 76.29747   | 46.02304   | 81.70    |
| 15 | CE          | CE 19:1    | 79.71011   | 104.21516   | 93.38671   | 78.67111   | 119.0    |
| 16 | CE          | CE 19:2    | 9.31680    | 15.70018    | 13.40323   | 16.71022   | 25.70    |

B

|      | 16-1         | 16-11        | 16-12        | 16-2         | 16-3         | 16-4         | 16-5    |
|------|--------------|--------------|--------------|--------------|--------------|--------------|---------|
| 14:0 | 366.207151   | 519.080276   | 489.623404   | 391.997333   | 517.263376   | 394.195228   | 500.0   |
| 15:0 | 201.578879   | 284.398350   | 244.049011   | 185.308187   | 285.598587   | 203.610721   | 256.7   |
| 16:0 | 8719.581657  | 12477.578985 | NaN          | 8855.969034  | 12123.860802 | 8722.796188  | 10544.5 |
| 16:1 | 2263.292995  | 4661.111102  | 3825.726416  | 3188.963147  | 3638.123680  | 2995.194100  | 3463.6  |
| 17:0 | 838.043317   | 1066.964064  | 885.655828   | 757.927793   | 1052.758402  | 789.159200   | 1014.0  |
| 17:1 | 358.284673   | 512.735415   | 478.678504   | 407.689948   | 475.720716   | 372.042406   | 501.6   |
| 18:0 | 2777.439159  | 3012.836369  | 2657.698155  | 2632.689125  | 3282.076417  | 2440.301592  | 3041.0  |
| 18:1 | 10997.217033 | 14282.296976 | 11941.622887 | 13083.144031 | 15512.540700 | 12791.730402 | 14531.7 |
| 18:2 | 2398.447524  | NaN          | NaN          | NaN          | NaN          | 2428.383267  | 3048.0  |
| 18:3 | 216.516554   | NaN          | 318.100907   | 257.375889   | 314.452189   | 218.063460   | 293.6   |
| 19:0 | 51.320348    | 100.106145   | 76.297469    | 46.023043    | 81.708145    | 52.746490    | 64.0    |
| 19:1 | 79.710113    | 104.215156   | 93.386714    | 78.671108    | 119.009738   | 80.840988    | 109.0   |
| 19:2 | 9.316802     | 15.700177    | 13.403230    | 16.710221    | 25.750033    | 14.385706    | 11.0    |
| 20:0 | 32.585812    | 59.859201    | NaN          | NaN          | 39.205712    | 35.475635    | 33.0    |

**Graphical visualization of tabular data.** For a quick tutorial of how to use liputils to extract residue information from lipidomics data, the following table is used (A). Data is arranged with samples in column, with analytes in row. To be processed directly with liputils `make_residues_table()` function, a table needs to avoid column multi-indexing, and have lipids as row index. This table needs to be loaded in pandas by specifying to skip the first two rows and to index the second column, or needs prior editing and all unwanted columns and row removed.

In B, all lipid residues have been counted per sample. NaN stands for “not a number”, and it is the way Numpy has to represent blank/missing values. When saved to a csv or Excel file, these values will result in empty cells. Missing values derive from residues that are present in the data, but are not represented in that particular sample.

## Supplementary Figure S2

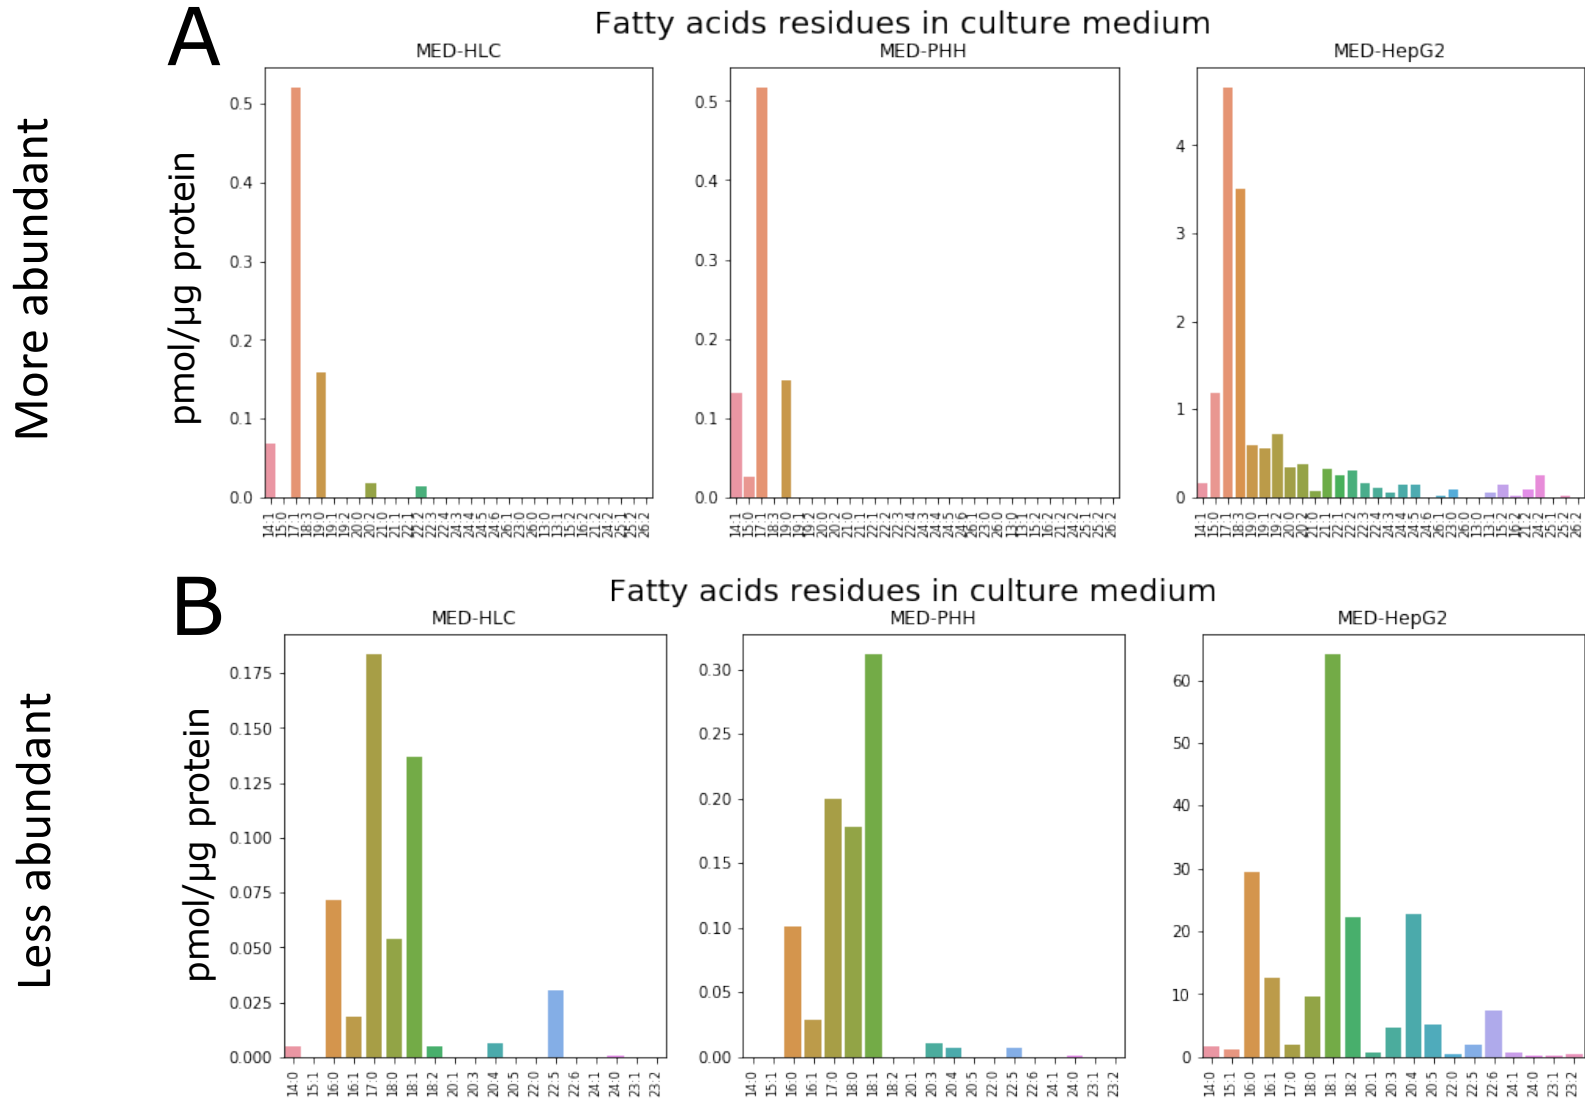

**Fatty acid moieties extracted from stock media.** Residues extracted from lipidomic data of HepG2, human hepatocyte-like cells (HLCs) and human primary hepatocytes (HPPs) culture media are shown (**A-B**) (n=1 per sample). HLCs and PHHs media were chemically defined, while HepG2 medium included 10% FBS comprised of complex lipid molecules. Units were unchanged during the extraction and are the same as the input data (pmol/ $\mu$ g protein).

## Supplementary Figure S3

A

Download results as tab-delimited text

| Input name            | RefMet name           | Formula    | Mass     | MW structure |
|-----------------------|-----------------------|------------|----------|--------------|
| PE(P-40:6)/PE(O-40:7) | PE(P-40:6)/PE(O-40:7) | C45H78NO7P | 775.5516 |              |

B

### RefMet Compounds with Formula C45H78NO7P

| Name                            | Formula    | Mass       |
|---------------------------------|------------|------------|
| PC(P-37:6)/PC(O-37:7)           | C45H78NO7P | 775.551592 |
| PE(P-16:0/24:6)/PE(O-16:1/24:6) | C45H78NO7P | 775.551592 |
| PE(P-18:0/22:6)/PE(O-18:1/22:6) | C45H78NO7P | 775.5516   |
| PE(P-18:1/22:5)/PE(O-18:2/22:5) | C45H78NO7P | 775.5516   |
| PE(P-20:1/20:5)/PE(O-20:2/20:5) | C45H78NO7P | 775.551592 |
| PE(P-40:6)/PE(O-40:7)           | C45H78NO7P | 775.5516   |

**Graphical output of the online RefMet translator.** The RefMet compound name translator, available at the following address:

([https://www.metabolomicsworkbench.org/databases/refmet/name\\_to\\_refmet\\_form.php](https://www.metabolomicsworkbench.org/databases/refmet/name_to_refmet_form.php)) attempts at translating non-RefMet compliant strings into official RefMet compounds (A). For low-resolution mass isomers, a list of possible molecular lipids that can be the parent compound is given (B).

Supplementary Table 1

| Residue | Comparison  | Difference  | Lower       | Upper       | Adjusted p-value |
|---------|-------------|-------------|-------------|-------------|------------------|
| 14:0    | HepG2-HLC-3 | 4.504313941 | 0.930846547 | 8.077781336 | 0.008694647      |
| 14:0    | HepG2-HLC-4 | 4.765475723 | 1.136602429 | 8.394349017 | 0.005990598      |
| 14:0    | HepG2-HLC-5 | 5.895734412 | 2.105499871 | 9.685968952 | 0.001038805      |
| 14:0    | HepG2-PHH   | 8.171247305 | 3.794661441 | 12.54783317 | 0.000106378      |
| 14:0    | HLC-3-PHH   | 3.666933364 | 0.093465969 | 7.240400759 | 0.042326626      |
| 14:0    | HLC-4-PHH   | 3.405771582 | -0.22310171 | 7.034644876 | 0.073199923      |
| 14:0    | HLC-5-PHH   | 2.275512894 | -1.51472165 | 6.065747434 | 0.413794388      |
| 14:1    | HepG2-HLC-3 | 0.220805953 | 0.15990581  | 0.281706095 | 1.28435E-09      |
| 14:1    | HepG2-HLC-4 | 0.256900038 | 0.195055652 | 0.318744425 | 8.0487E-11       |
| 14:1    | HepG2-HLC-5 | 0.248820162 | 0.184225806 | 0.313414517 | 3.79583E-10      |
| 14:1    | HepG2-PHH   | 0.291483518 | 0.216896381 | 0.366070655 | 2.83046E-10      |
| 14:1    | HLC-3-PHH   | 0.070677565 | 0.009777423 | 0.131577707 | 0.01736879       |
| 15:2    | HepG2-HLC-3 | 0.137304833 | 0.083570279 | 0.191039387 | 8.57222E-07      |
| 15:2    | HepG2-HLC-4 | 0.155224912 | 0.100657215 | 0.209792609 | 1.30395E-07      |
| 15:2    | HepG2-HLC-5 | 0.16128325  | 0.104289149 | 0.218277351 | 1.43257E-07      |
| 15:2    | HepG2-PHH   | 0.169815569 | 0.10400445  | 0.235626688 | 7.2534E-07       |
| 18:1    | HepG2-HLC-4 | 24.90752905 | -20.9052291 | 70.72028722 | 0.510581085      |
| 18:1    | HepG2-PHH   | 78.38682438 | 23.13455912 | 133.6390896 | 0.002810973      |
| 18:1    | HLC-3-PHH   | 58.37080932 | 13.25752365 | 103.484095  | 0.006871231      |
| 18:1    | HLC-4-PHH   | 53.47929533 | 7.66653716  | 99.2920535  | 0.016581797      |
| 18:1    | HLC-5-PHH   | 43.47853545 | -4.37132989 | 91.32840078 | 0.087584786      |
| 18:2    | PHH-HepG2   | 26.67016862 | 21.63910102 | 31.70123622 | 4.61E-13         |
| 18:2    | PHH-HLC-3   | 27.06354373 | 22.95569424 | 31.17139323 | 2.4E-14          |
| 18:2    | PHH-HLC-4   | 28.73763907 | 24.56609819 | 32.90917995 | 2.2E-14          |
| 18:2    | PHH-HLC-5   | 28.21689171 | 23.85985936 | 32.57392406 | 2.6E-14          |
| 19:1    | HepG2-HLC-3 | 0.143283663 | 0.028781198 | 0.257786128 | 0.009269628      |
| 19:1    | HepG2-HLC-4 | 0.160547234 | 0.044269432 | 0.276825037 | 0.003696694      |
| 19:1    | HepG2-HLC-5 | 0.168075629 | 0.046627425 | 0.289523833 | 0.003612389      |
| 19:1    | HepG2-PHH   | 0.225053276 | 0.084816969 | 0.365289583 | 0.00072411       |
| 20:1    | HepG2-HLC-3 | 1.54129587  | 0.826598667 | 2.255993072 | 1.32953E-05      |
| 20:1    | HepG2-HLC-4 | 1.605891514 | 0.880113074 | 2.331669954 | 8.95599E-06      |
| 20:1    | HepG2-HLC-5 | 1.844624653 | 1.086573796 | 2.602675511 | 1.94759E-06      |
| 20:1    | HepG2-PHH   | 2.205286886 | 1.329965153 | 3.080608619 | 1.08941E-06      |
| 20:4    | PHH-HepG2   | 11.81816819 | 5.894196339 | 17.74214003 | 4.21323E-05      |
| 20:4    | PHH-HLC-3   | 12.36240042 | 7.525497661 | 17.19930318 | 8.53755E-07      |
| 20:4    | PHH-HLC-4   | 13.06167378 | 8.149775806 | 17.97357175 | 4.31178E-07      |
| 20:4    | PHH-HLC-5   | 10.59595832 | 5.46564821  | 15.72626843 | 2.54284E-05      |
| 24:5    | HepG2-HLC-3 | 0.210227209 | 0.076868649 | 0.343585769 | 0.000891533      |
| 24:5    | HepG2-HLC-4 | 0.273972769 | 0.138546512 | 0.409399027 | 3.44339E-05      |
| 24:5    | HepG2-HLC-5 | 0.23727735  | 0.095829237 | 0.378725463 | 0.000425134      |
| 24:5    | HepG2-PHH   | 0.308441094 | 0.145110881 | 0.471771306 | 9.10419E-05      |
| 24:6    | HepG2-HLC-3 | 0.45441577  | 0.319676332 | 0.589155208 | 5.34231E-09      |
| 24:6    | HepG2-HLC-4 | 0.504574457 | 0.367745911 | 0.641403003 | 9.15416E-10      |
| 24:6    | HepG2-HLC-5 | 0.475211758 | 0.332299002 | 0.618124513 | 7.02772E-09      |
| 24:6    | HepG2-PHH   | 0.544408685 | 0.37938725  | 0.709430121 | 8.18578E-09      |

**Detailed statistically significant differences for each comparison, per residue.** Statistically significant differences were determined with ANOVA followed by Tukey's post-hoc test (n=9 HLC-3, n=8 HLC-4, n=6 HLC-5, n=3 PHH and HepG2 samples).

Supplementary Table 2

| Residue | Comparison                      | Difference  | Lower       | Upper       | Adjusted p-value |
|---------|---------------------------------|-------------|-------------|-------------|------------------|
| 18:3    | Overfeeding-Saturated fats      | 83.0989348  | 32.55919384 | 133.6386758 | 0.001497514      |
| 20:1    | Saturated fats-Overfeeding      | 69.95086247 | 21.33220413 | 118.5695208 | 0.004720554      |
| 20:1    | Unsaturated fats-Overfeeding    | 79.98050715 | 31.36184881 | 128.5991655 | 0.001490594      |
| 20:2    | Saturated fats-Overfeeding      | 37.06273322 | 1.541102354 | 72.58436408 | 0.040064848      |
| 20:2    | Unsaturated fats-Overfeeding    | 37.24209302 | 1.720462156 | 72.76372389 | 0.039035724      |
| 20:3    | Overfeeding-Saturated fats      | 46.92097803 | 1.782919941 | 92.05903611 | 0.040873888      |
| 20:3    | Overfeeding-Unsaturated fats    | 46.96134996 | 1.82329187  | 92.09940804 | 0.040686328      |
| 20:4    | Saturated fats-Overfeeding      | 23.63496846 | 3.364934857 | 43.90500207 | 0.02103841       |
| 20:4    | Unsaturated fats-Overfeeding    | 31.10317186 | 10.83313825 | 51.37320547 | 0.002767359      |
| 20:5    | Overfeeding-Saturated fats      | 22.77345043 | 0.33089319  | 45.21600767 | 0.046393858      |
| 20:5    | Overfeeding-Unsaturated fats    | 26.9670954  | 4.524538156 | 49.40965264 | 0.017378353      |
| 22:2    | Unsaturated fats-Overfeeding    | 66.11189494 | 10.99301677 | 121.2307731 | 0.01758215       |
| 22:3    | Saturated fats-Overfeeding      | 60.9218937  | 2.183451685 | 119.6603357 | 0.041365586      |
| 22:4    | Overfeeding-Saturated fats      | 56.98806747 | 4.495712921 | 109.480422  | 0.032177736      |
| 22:6    | Saturated fats-Overfeeding      | 29.37200864 | 11.42672197 | 47.31729532 | 0.001561442      |
| 22:6    | Unsaturated fats-Overfeeding    | 22.6405984  | 4.695311727 | 40.58588508 | 0.012548342      |
| 24:1    | Saturated fats-Overfeeding      | 39.81046071 | 12.01919479 | 67.60172662 | 0.004888639      |
| 24:1    | Unsaturated fats-Overfeeding    | 66.73494923 | 38.94368331 | 94.52621514 | 2.47704E-05      |
| 26:0    | Saturated fats-Unsaturated fats | 384.6559913 | 60.23615386 | 709.0758288 | 0.018933907      |
| 30:1    | Saturated fats-Unsaturated fats | 92.89024137 | 8.0615839   | 177.7188988 | 0.030635146      |

Detailed statistically significant differences for each comparison, per residue. Statistically significant differences were determined with ANOVA followed by Tukey's post-hoc test (n=7 subjects per group).

## Supplemental Materials and Methods

**General description.** We have developed `liputils` as a lightweight Python library focused on text-based recognition of lipid identifiers that can be seamlessly integrated in a Python-based data analysis pipeline. Its primary function is to provide fatty acid moieties information from any RefMet-compliant lipid annotation.

An in-depth, Python-based analysis of a dataset is available as Supplemental analysis protocol online in PDF form, or in its native Jupyter notebook file format at the [following address](#).

In the main text, the User is presented with a basic protocol that automatically processes lipidomics data in tabular format in order to extract residue information and package the results into a new, easily readable data table. In here, we will be discussing some useful functions and methods of the library that can be exploited by the more advanced User and suited to personalized analysis pipelines.

**Functionality of the `Lipid` class.** In `liputils`, every lipid identifier (a text string) is managed through the `Lipid` class. Then, lipid properties can be accessed through each object's methods. An example:

```
>>> from liputils import Lipid
>>> lip = Lipid("Cer(d20:0/22:0)")
>>> lip.name
'Cer(d20:0/22:0)'
>>> lip.refmet_class()
'Cer'
```

`Lipid.name` is produced by the class constructor. The vast majority of other methods are callable, in order to save time when initializing each new `Lipid` object. In this case, `Lipid.refmet_class()` is a method that computes the lipid class, given as abbreviation, upon call. If needed, the `amount` parameter can be used to define the amount of the lipid being processed (it defaults to picomoles), and to calculate the number of molecules:

```
>>> lip = Lipid("Cer(d20:0/22:0)", amount=0.12512)
```

```
>>> lip.molecules
75349026402.78401
```

Other units can be specified:

```
>>> lip = Lipid("Cer(d20:0/22:0)", amount=0.12512, unit="attomoles")

>>> lip.molecules
75349.02640278402
```

**Fatty moieties identification.** The backbone of the `Lipid` class functionality is the ability of decoding from lipid identifiers their carbon chains composition. `liputils` accepts a generic lipid format in the form of `CLASS N:N/M:M/././.` or `CLASS(N:N/M:M/././.)` (other mass isobars), or [fully RefMet-compliant residue naming](#). If unsure about your data format, you can try and batch-translate your lipid IDs with RefMet's online translator. By adhering to RefMet's nomenclature, any compliant lipid name will be properly managed by `liputils`'s method `Lipid.refmet_residues()`.

```
>>> lip1 = Lipid("octadecatrienoic acid")

>>> lip2 = Lipid("linolenic acid")

>>> lip3 = Lipid("FA(18:3)")

>>> lip4 = Lipid("linoleyl palmitate")

>>> lip1.refmet_residues()
(['18:3'], 1)

>>> lip2.refmet_residues()
(['18:3'], 1)

>>> lip3.refmet_residues()
(['18:3'], 1)

>>> lip4.refmet_residues()
(['18:1', '16:0'], 1)
```

The method returns a list of residues that were found in the lipid identifier, and an integer index that refers to the *ambiguities* found within the lipid identifiers. This feature was introduced to let the User choose what to do in the presence of unresolved mass isobars.



For example, in the case of this non-RefMet compliant lipid identifier taken from a commercial lipidomic analysis:

```
>>> lip = Lipid("TAG 48:2 total (14:0/16:0/18:2)(14:0/16:1/18:1)(16:0/16:1/16:1)")
>>> lip.refmet_residues()
(['48:2', '14:0', '16:0', '18:2', '14:0', '16:1', '18:1', '16:0', '16:1', '16:1'],
3)
```

In this case, `liputils` reports each residue in the `list` it returns, but it also returns 3 as ambiguity index, to reflect the fact that the molecular lipid was not fully resolved, and there were three different but equivalent mass isobars.

When using non-Refmet compliant lipids, Users are encouraged to use `Lipid.lipid_class()` and `Lipid.residues()` methods instead:

```
>>> lip.refmet_class() # not appropriate
'TAG 48:2 total'

>>> lip.lipid_class() # appropriate
'TAG'

>>> lip.residues() # same result, in this case
(['14:0', '16:0', '18:2', '14:0', '16:1', '18:1', '16:0', '16:1', '16:1'],
3)
```

If desired, it can be useful to suppress all unresolved mass isobars by setting the `drop_ambiguous` parameter to `True` (it defaults to `False`):

```
>>> lip.residues(drop_ambiguous=True)
([], 0)
```

In this case, an empty `list` is returned together with 0 ambiguity index.

**Helper functions.** `liputils` contains some functions that complement the `Lipid` class functionality. In the manuscript (**Materials and Methods** → **Procedure**), the basic use case of `make_residues_table()` is presented. There are parameters that can be set to alter the function's default behavior:

`drop_ambiguous`: defaults to `False`. As in the case mentioned above, this produces a residues table that does not take into account unresolved mass isobars.

**name**: as `make_residues_table()` returns a nameless `pandas.DataFrame` object, this parameter sets a string attribute within the object, under `pandas.DataFrame.name`, that can be useful when a string identifier for exporting the table to a `.csv` file (or for otherwise any other use), especially when working with multiple objects simultaneously. Defaults to "residues\_table".

**replace\_nan**: this replaces any missing value (empty cells) in the input table with the desired value. It defaults to `0`.

**cleanup**: this parameter is used to avoid processing some lipids that may be found in the data but are not meaningful to process. These may include, for example, identifiers with "total" (like "total cholesterol"), or abbreviations thereof (like "TC" for total cholesterol, or "FC" for free cholesterol). The list of unwanted terms is read from another parameter, **unwanted** (see below). It defaults to `True`.

**unwanted**: this parameter defaults to a list of unwanted identifiers, that are altogether skipped in the processing if `cleanup` is `True` (the default behavior). This parameter can be replaced by a User-defined list of choice. It defaults to `["total", "fc", "tc"]`.

**absolute\_amount**: this switches the function from counting the actual residues amount, in the same unit as in the input table, to counting in the actual number of residues. For example, if the input table is in picomoles/ $\mu\text{g}$  tissue, by default the table produced by `make_residues_table()` will be in picomoles/ $\mu\text{g}$  tissue. Otherwise, if **absolute\_amount** is set to `True`, then the actual number of residues will be counted. The default **unit** is "picomoles", but this can be set otherwise by passing another **unit** as keyword argument. It defaults to `False`.

In addition to the use case presented in the manuscript, an additional example can be found in the Supplemental analysis protocol at page 5.

Two other functions come handy when processing residues subsets. To focus on particular residues, it is possible to mix `saturated()` and `max_carbon()` to dictate which residues to keep and which to discard. Specifically:

**saturated()**: its intended use is with string residue identifiers (in the form of `\d:\d`). It returns `True` if the residue contains unsaturations, `False` otherwise.

**max\_carbon()**: its intended use is with string residue identifiers (in the form of `\d:\d`). An integer number of desired carbon atoms must also be specified when calling the function. If

the number of carbon atoms in the residue is lower or equal to the specified maximum allowed value, the function returns True, False otherwise.

Some examples:

```
>>> from liputils import saturated, max_carbon
```

```
>>> saturated("12:0")
True
```

```
>>> saturated("12:1")
False
```

```
>>> max_carbon("12:1", 11)
False
```

```
>>> max_carbon("12:1", 12)
True
```

```
>>> max_carbon("12:1", 13)
True
```

These functions come handy in *list comprehensions* (especially useful when the result is then used to exclude/include elements in an index):

```
>>> my_residues = ["12:0", "17:1", "24:0", "24:1", "24:2", "26:3"]
```

```
>>> [not saturated(x) and max_carbon(x, 24) for x in my_lipids]
[False, True, False, True, True, False]
```

Conveniently, `saturated()` can be negated via the `not` operator if the residue is required to having exactly zero unsaturations.

Example use of these functions can be found in the Supplemental analysis protocol, starting from page 16, when they are used to restrict the plots to specific residues.

**Online Documentation.** As `liputils` is in active development, the online documentation reflects the latest changes and updates to the library. It can be accessed at [liputil's pip package manager page](#), or in [liputil's GitHub repository](#).
